# Supplementary figures and images for: Coherent state switching using vibrational polaritons in an asymmetric double-well potential
Source: Royal Society of Chemistry journal article supplement (doi:10.1039/d3cp05568j), 2024-01-01

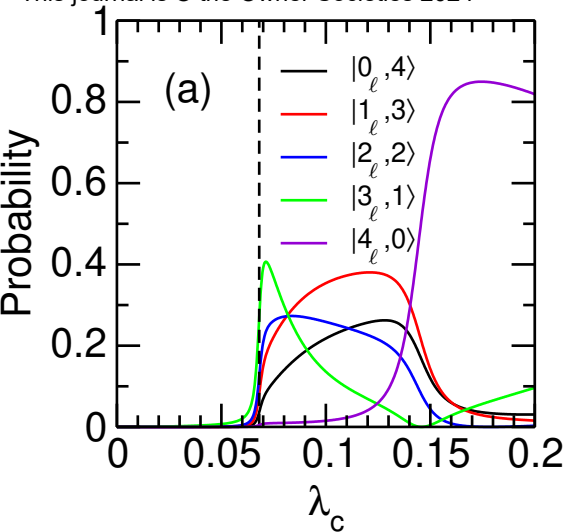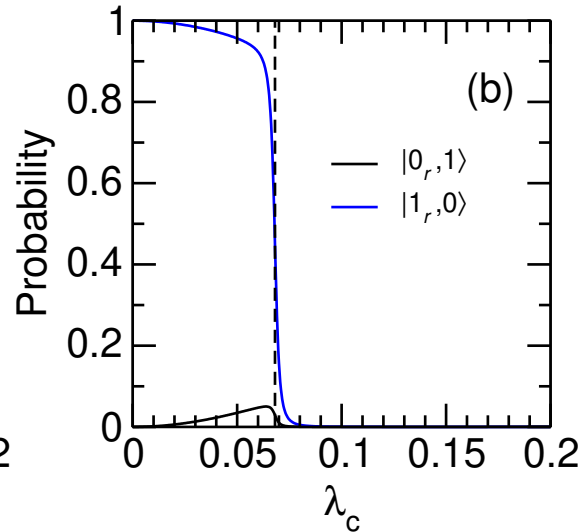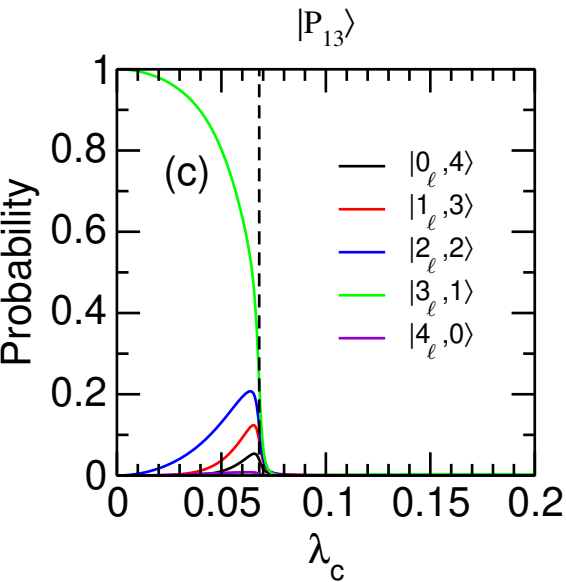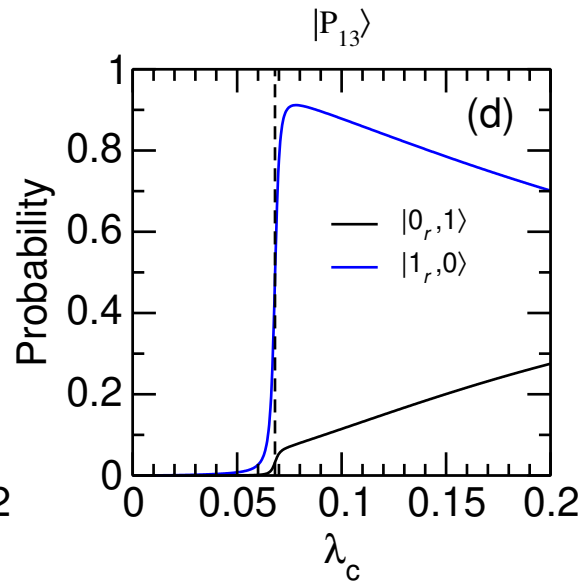

Supplement: d3cp05568j1.pdf [file d3cp05568j1.pdf]

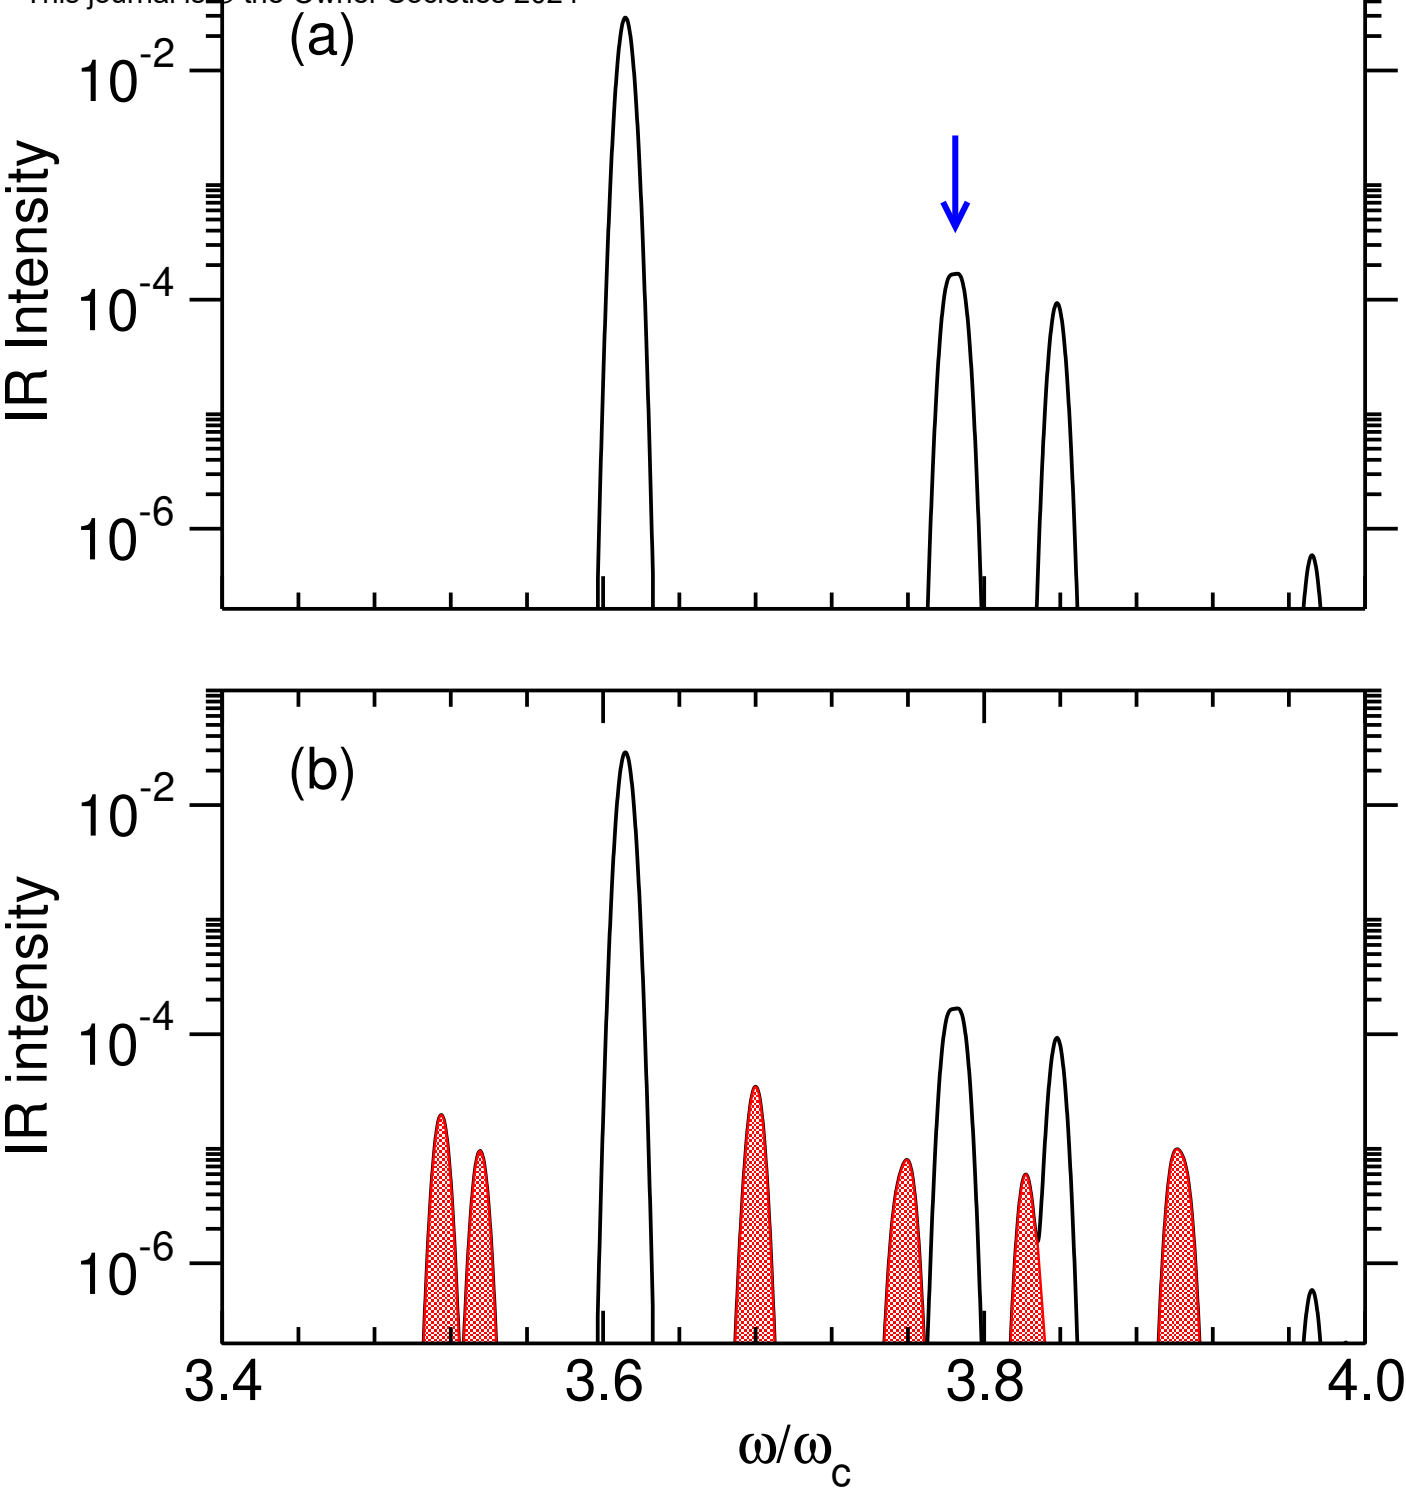

Supplement: d3cp05568j2.pdf [file d3cp05568j2.pdf]
